# Supplementary material for: Rational construction of a metal core for smart combination with Li4Ti5O12 as integrated arrays with superior high-rate Li-ion storage performance
Source: Royal Society of Chemistry journal article supplement (doi:10.1039/c6ta10251d), 2016-12-08
Supplement: c6ta10251d1.pdf [file c6ta10251d1.pdf]

## Support Information for

### Rational Construction of Metal Core for Smart Combination with $\text{Li}_4\text{Ti}_5\text{O}_{12}$ as integrated Arrays with Superior High-Rate Li-ion storage performance

Cheng-ao Zhou,<sup>a</sup> Xinhui Xia,<sup>\*a</sup> Yadong Wang,<sup>b</sup> Yu Zhong,<sup>a</sup> Zhujun Yao,<sup>a</sup> Xiuli Wang,<sup>a</sup> and

Jiangping Tu<sup>\*a</sup>

<sup>a</sup> State Key Laboratory of Silicon Materials, Key Laboratory of Advanced Materials and Applications for Batteries of Zhejiang Province, and School of Materials Science&Engineering, Zhejiang University, Hangzhou 310027, P. R. China

Email: helloxxh@zju.edu.cn; tujp@zju.edu.cn

<sup>b</sup> School of Engineering, Nanyang Polytechnic, 569830, Singapore

**Table S1. Electrochemical performance of different LTO-based electrodes**

| Reference                                                                                                   | Rate performance ( $\text{mA h g}^{-1}$ ) | Capacity loss in long cycle         |
|-------------------------------------------------------------------------------------------------------------|-------------------------------------------|-------------------------------------|
| <b>Our work</b>                                                                                             | 174 (1 C)                                 | 9.7% loss after 3000 cycles at 20 C |
|                                                                                                             | 167 (5 C)                                 |                                     |
|                                                                                                             | 161 (10 C)                                |                                     |
|                                                                                                             | 155 (20 C)                                |                                     |
|                                                                                                             | 146 (50 C)                                |                                     |
|                                                                                                             | 140 (100 C)                               |                                     |
| <b>Hydrogenated <math>\text{Li}_4\text{Ti}_5\text{O}_{12}</math> nanowire<sup>1</sup></b>                   | 173 (0.2 C)                               | 5 % loss after 100 cycles at 5 C    |
|                                                                                                             | 166 (1 C)                                 |                                     |
|                                                                                                             | 157 (5 C)                                 |                                     |
|                                                                                                             | 145 (10 C)                                |                                     |
|                                                                                                             | 135 (20 C)                                |                                     |
|                                                                                                             | 125 (30 C)                                |                                     |
| <b><math>\text{Li}_4\text{Ti}_5\text{O}_{12}</math> hollow spheres<sup>2</sup></b>                          | 172 (1 C)                                 | 12 % loss after 300 cycles at 5C    |
|                                                                                                             | 150 (2 C)                                 |                                     |
|                                                                                                             | 139 (3 C)                                 |                                     |
|                                                                                                             | 128 (5 C)                                 |                                     |
|                                                                                                             | 115 (10 C)                                |                                     |
|                                                                                                             | 104 (20 C)                                |                                     |
| <b>Rutile <math>\text{TiO}_2</math> coated <math>\text{Li}_4\text{Ti}_5\text{O}_{12}</math><sup>3</sup></b> | 178 (1 C)                                 | 2 % loss after 100 cycles at 20 C   |
|                                                                                                             | 170 (5 C)                                 |                                     |
|                                                                                                             | 161 (10 C)                                |                                     |

|                                                                                                 |               |                                      |
|-------------------------------------------------------------------------------------------------|---------------|--------------------------------------|
|                                                                                                 | 152 (20 C)    |                                      |
|                                                                                                 | 141 (30 C)    |                                      |
|                                                                                                 | 110 (60 C)    |                                      |
|                                                                                                 | 168.1 (0.2 C) |                                      |
|                                                                                                 | 165.8 (0.5 C) |                                      |
|                                                                                                 | 162.4 (1 C)   |                                      |
| <b>Hierarchically porous<br/>Li<sub>4</sub>Ti<sub>5</sub>O<sub>12</sub><sup>4</sup></b>         | 156.8 (2 C)   | 4.8 % loss after 200 cycles at 2 C   |
|                                                                                                 | 143.9 (3 C)   |                                      |
|                                                                                                 | 134.6 (5 C)   |                                      |
|                                                                                                 | 116 (10 C)    |                                      |
|                                                                                                 | 92.3 (20 C)   |                                      |
|                                                                                                 |               |                                      |
|                                                                                                 | 171.4 (0.1 C) |                                      |
|                                                                                                 | 168.8 (1 C)   |                                      |
|                                                                                                 | 150 (5 C)     |                                      |
| <b>Li<sub>4</sub>Ti<sub>5</sub>O<sub>12</sub>-graphene<br/>composite<sup>5</sup></b>            | 136.4 (10 C)  | 2.9 % loss after 100 cycles at 60 C  |
|                                                                                                 | 122 (20 C)    |                                      |
|                                                                                                 | 105 (30 C)    |                                      |
|                                                                                                 | 82.7 (60 C)   |                                      |
|                                                                                                 |               |                                      |
|                                                                                                 |               |                                      |
|                                                                                                 | 161.7 (0.2 C) |                                      |
|                                                                                                 | 145 (1 C)     |                                      |
|                                                                                                 | 138.5 (2 C)   |                                      |
| <b>Li<sub>4</sub>Ti<sub>5</sub>O<sub>12</sub><br/>nanoparticles with<br/>carbon<sup>6</sup></b> | 130.8 (5 C)   | 5.4 % loss after 1000 cycles at 20 C |
|                                                                                                 | 121.3 (10 C)  |                                      |
|                                                                                                 | 109.7 (20 C)  |                                      |
|                                                                                                 | 92.6 (40 C)   |                                      |
|                                                                                                 | 73.4 (80 C)   |                                      |
|                                                                                                 |               |                                      |
|                                                                                                 | 171 (0.5 C)   |                                      |
| <b>porous Li<sub>4</sub>Ti<sub>5</sub>O<sub>12</sub> with<br/>N-doped carbon<sup>7</sup></b>    | 169 (1 C)     | 17 % loss after 2200 cycles at 2 C   |
|                                                                                                 | 145 (5 C)     |                                      |
|                                                                                                 | 125 (10 C)    |                                      |
|                                                                                                 | 160 (1 C)     |                                      |
| <b>Li<sub>4</sub>Ti<sub>5</sub>O<sub>12</sub> with Ti and<br/>carbon<sup>8</sup></b>            | 145 (5 C)     | 10 % loss after 100 cycles at 1 C    |
|                                                                                                 | 155 (10 C)    |                                      |
|                                                                                                 | 75 (20 C)     |                                      |
|                                                                                                 | 161 (0.5 C)   |                                      |
| <b>Cr-doped Li<sub>4</sub>Ti<sub>5</sub>O<sub>12</sub><sup>9</sup></b>                          | 159 (1 C)     | None                                 |
|                                                                                                 | 145 (5 C)     |                                      |
|                                                                                                 | 129 (10 C)    |                                      |
|                                                                                                 | 140 (0.1 C)   |                                      |
| <b>Phosphiated<br/>Li<sub>4</sub>Ti<sub>5</sub>O<sub>12</sub><sup>10</sup></b>                  | 130 (0.5 C)   | None                                 |
|                                                                                                 | 125 (1 C)     |                                      |
|                                                                                                 | 100 (10 C)    |                                      |
|                                                                                                 | 171 (0.5 C)   |                                      |
| <b>Mesoporous Li<sub>4</sub>Ti<sub>5</sub>O<sub>12</sub><br/>with rGO<sup>11</sup></b>          | 145 (1 C)     | 15 % loss after 2000 cycles at 20 C  |

|                                                                                  |             |                                    |
|----------------------------------------------------------------------------------|-------------|------------------------------------|
|                                                                                  | 138 (5 C)   |                                    |
|                                                                                  | 137 (10 C)  |                                    |
|                                                                                  | 136 (20 C)  |                                    |
|                                                                                  | 132 (40 C)  |                                    |
|                                                                                  | 165 (1 C)   |                                    |
| <b>Self-supported</b>                                                            | 154 (10 C)  |                                    |
| <b>Li<sub>4</sub>Ti<sub>5</sub>O<sub>12</sub>-C nanotube arrays<sup>12</sup></b> | 135 (30 C)  | 10 % loss after 500 cycles at 10 C |
|                                                                                  | 106 (60 C)  |                                    |
|                                                                                  | 81 (100 C)  |                                    |
|                                                                                  | 151 (1 C)   |                                    |
|                                                                                  | 129 (5 C)   |                                    |
| <b>3D nanoarchitected</b>                                                        | 125 (10 C)  |                                    |
| <b>Li<sub>4</sub>Ti<sub>5</sub>O<sub>12</sub><sup>13</sup></b>                   | 120 (30 C)  | 2 % loss after 1000 cycles at 50 C |
|                                                                                  | 115 (50 C)  |                                    |
|                                                                                  | 103 (100 C) |                                    |

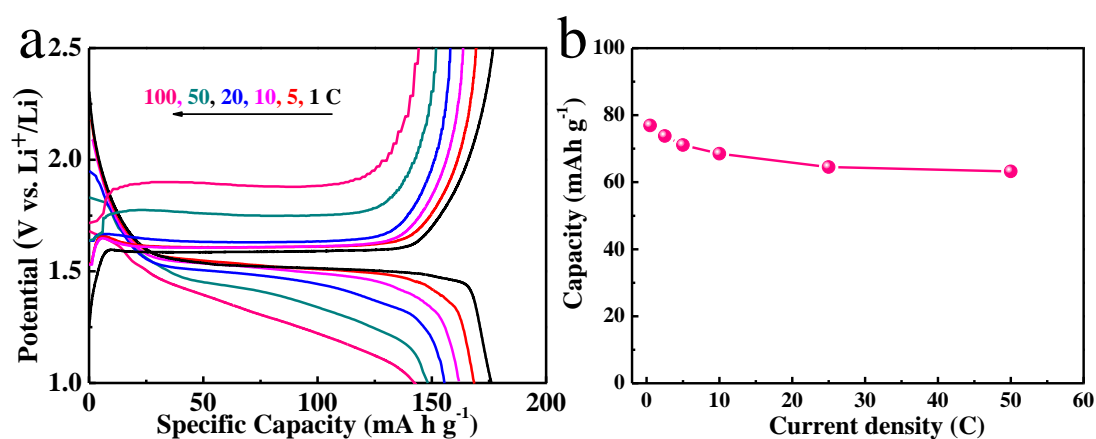

**Fig. S2** (a) Charge/discharge curves at different rates; (b) Specific capacities based on the total weight of Co/LTO arrays (Co+LTO)

1. L. Shen, E. Uchaker, X. Zhang and G. Cao, *Adv. Mater.*, 2012, **24**, 6502-6506.
2. L. Yu, H. B. Wu and X. W. Lou, *Adv. Mater.*, 2013, **25**, 2296-2300.
3. Y. Q. Wang, L. Gu, Y. G. Guo, H. Li, X. Q. He, S. Tsukimoto, Y. Ikuhara and L. J. Wan, *J. Am. Chem. Soc.*, 2012, **134**, 7874-7879.
4. L. Shen, C. Yuan, H. Luo, X. Zhang, K. Xu and Y. Xia, *J. Mater. Chem.*, 2010, **20**, 6998.

5. L. Shen, C. Yuan, H. Luo, X. Zhang, S. Yang and X. Lu, *Nanoscale*, 2011, **3**, 572-574.
6. L. Shen, X. Zhang, E. Uchaker, C. Yuan and G. Cao, *Adv. Energy Mater.*, 2012, **2**, 691-698.
7. L. Zhao, Y. S. Hu, H. Li, Z. Wang and L. Chen, *Adv. Mater.* , 2011, **23**, 1385-1388.
8. Y. Wang, H. Liu, K. Wang, H. Eiji, Y. Wang and H. Zhou, *J. Mater. Chem.*, 2009, **19**, 6789.
9. H. Song, S.-W. Yun, H.-H. Chun, M.-G. Kim, K. Y. Chung, H. S. Kim, B.-W. Cho and Y.-T. Kim, *Energy Environ. Sci.*, 2012, **5**, 9903.
10. M. R. Jo, K. M. Nam, Y. Lee, K. Song, J. T. Park and Y.-M. Kang, *Chem. Commun.* , 2011, **47**, 11474-11476.
11. W. Chen, H. Jiang, Y. Hu, Y. Dai and C. Li, *Chem. Commun.* , 2014, **50**, 8856-8859.
12. J. Liu, K. Song, P. A. van Aken, J. Maier and Y. Yu, *Nano Lett.*, 2014, **14**, 2597-2603.
13. B. Zhao, X. Deng, R. Ran, M. Liu and Z. Shao, *Adv. Energy Mater.*, 2016, **6**, 1500924.
